# Supplementary material for: Indikation, Prozedere und Outcome der präklinischen Notfallthorakotomie – eine systematische Literaturrecherche
Source: Springer Nature journal article supplement (doi:10.1007/s00113-020-00777-8), 2020-03-05
Supplement: MOESM1 [file 17773826]

### Stichworte, kombiniert mit dem boolschen Operator "OR"

| Super group           | Synonym keywords combined with "OR"                                                                                                                                                                | Search number |
|-----------------------|----------------------------------------------------------------------------------------------------------------------------------------------------------------------------------------------------|---------------|
| Location              | „prehospital “<br>„preclinical “<br>„out-of-hospital “<br>„on scene “                                                                                                                              | #1            |
| Thoracotomy procedure | „resuscitative thoracotomy “<br>„Thoracotomy” (MeSH)<br>„clamshell thoracotomy “<br>„urgent thoracotomy “<br>„emergency thoracotomy “<br>“Prehospital and Emergency Department Thoracotomy (PHRT)” | #2            |
| Cardiac arrest        | „traumatic cardiac arrest “<br>„cardiac arrest “ (MeSH)<br>„out of hospital cardiac arrest “                                                                                                       | #3            |
| Thoracic injuries     | „thoracic injuries “ (MeSH)<br>„chest injuries “<br>„thoracic trauma “<br>„chest trauma “<br>„penetrating trauma “<br>“blunt trauma”                                                               | #4            |

## Stichworte kombiniert mit dem Booleschen Operator „AND“

| Super group combination                                                                   | Search number |
|-------------------------------------------------------------------------------------------|---------------|
| Location (#1) AND Thoracotomy procedure (#2)                                              | #5            |
| cardiac arrest (#3) AND Thoracic injuries (#4)                                            | #6            |
| (Location AND Thoracotomy procedure [#5]) AND (cardiac arrest AND Thoracic injuries [#6]) | #7            |
| <b>Simple keywords</b>                                                                    |               |
| “prehospital thoracotomy” AND                                                             | #8            |
| “preclinical thoracotomy” AND                                                             | #9            |

## Vollständige Suche

01. prehospital
02. preclinical
03. out-of-hospital
04. on scene
05. 1 OR 2 OR 3 Or 4 (in this thesis registered as #1)
06. resuscitative thoracotomy
07. Thoracotomy (MeSh)
08. thoracotom\*
09. clamshell thoracotom\*
10. urgent thoracotom\*
11. emergency thoracotom\*
12. Prehospital and Emergency Department Thoracotomy (PHRT)
13. 6 OR 7 OR 8 OR 9 OR 10 OR 11 OR 12 (in this thesis registered as #2)
14. traumatic cardiac arrest
15. cardiac arrest (MeSh)
16. cardiac arrest
17. out of hospital cardiac arrest
18. 14 OR 15 OR 16 OR 17 (in this thesis registered as #3)
19. thoracic injur\*(MeSh)
20. thoracic injur\*
21. chest injur\*
22. thoracic trauma
23. chest trauma
24. penetrating trauma
25. 19 OR 20 OR 21 OR 22 OR 23 OR 24 (in this thesis registered as #4)
26. 06 AND 13 (registered as #5)
27. 18 AND 25 (registered as #6)
28. 27 AND 27 (registered as #7)
29. 01 AND 08 (registered as #8)
30. 02 AND 08 (registered as #9)

### Stufenschema der Ein- und Ausschlusskriterien

|                                                                               |                                                                                                                                                                                          |                                                                                                                                                                                                                                                                      |
|-------------------------------------------------------------------------------|------------------------------------------------------------------------------------------------------------------------------------------------------------------------------------------|----------------------------------------------------------------------------------------------------------------------------------------------------------------------------------------------------------------------------------------------------------------------|
| <b>Erste Stufe</b><br>Screening der Titel aller<br>gefundener Publikationen   | <b>Einschluss von</b><br>Jeder gezeigte Artikel zu<br>emergency/resuscitative thoracotomy,<br>präklinisches Management von TCA<br>(traumatic cardiac arrest), ATLS,<br>(offener)CPR etc. | <b>Ausschluss von</b><br>- Publikationen mit<br>anderen Inhalten (soweit<br>im Titel erkennbar) z.B.<br>Tierstudien<br>- Publikationen in<br>anderen Sprachen als<br>Deutsch und Englisch<br>- Publikationen, die keine<br>peer reviewed<br>publications darstellten |
| <b>Zweite Stufe</b><br>Screening der Abstracts aller<br>ausgewählten Artikel  | <b>Einschluss von</b><br>Jede Publikation welche<br>Informationen zu PHRT enthält                                                                                                        | <b>Ausschluss von</b><br>Artikeln über emergency<br>department<br>Thorakotomien oder<br>anderen Maßnahmen<br>(z.B. Bluttransfusionen)                                                                                                                                |
| <b>Dritte Stufe</b><br>Screening des Volltextes aller<br>ausgewählten Artikel | <b>Einschluss von</b><br>Publikationen die Daten zur PHRT<br>boten                                                                                                                       | <b>Ausschluss von</b><br>Publikationen ohne<br>PHRT Daten z.B.<br>Instruktionen, Reviews<br>oder Leserbriefen                                                                                                                                                        |
